# Supplementary material for: Site-directed late-stage diversification of macrocyclic nannocystins facilitating anticancer SAR and mode of action studies
Source: Royal Society of Chemistry journal article supplement (doi:10.1039/d2md00393g), 2022-12-22

## Supporting Information for

Site-directed Late-Stage Diversification of Macrocyclic Nannocystins

Facilitating Anticancer SAR and Mode of Action Studies

*Han Zhang, Yunfeng Tian, Xiaoya Yuan, Fei Xie, Siqi Yu, Jiayou Cai, Bin Sun, Changliang Shan,\**

*Weicheng Zhang\**

*\* The State Key Laboratory of Medicinal Chemical Biology, College of Pharmacy, and Tianjin Key Laboratory of Molecular Drug Research, Nankai University, Tianjin, People's Republic of China*

E-mail: zhangweicheng@nankai.edu.cn, changliangshan@nankai.edu.cn

## Table of Contents

|                                                                             |    |
|-----------------------------------------------------------------------------|----|
| <sup>1</sup> H and <sup>13</sup> C NMR spectra of synthetic compounds ..... | S2 |
|-----------------------------------------------------------------------------|----|

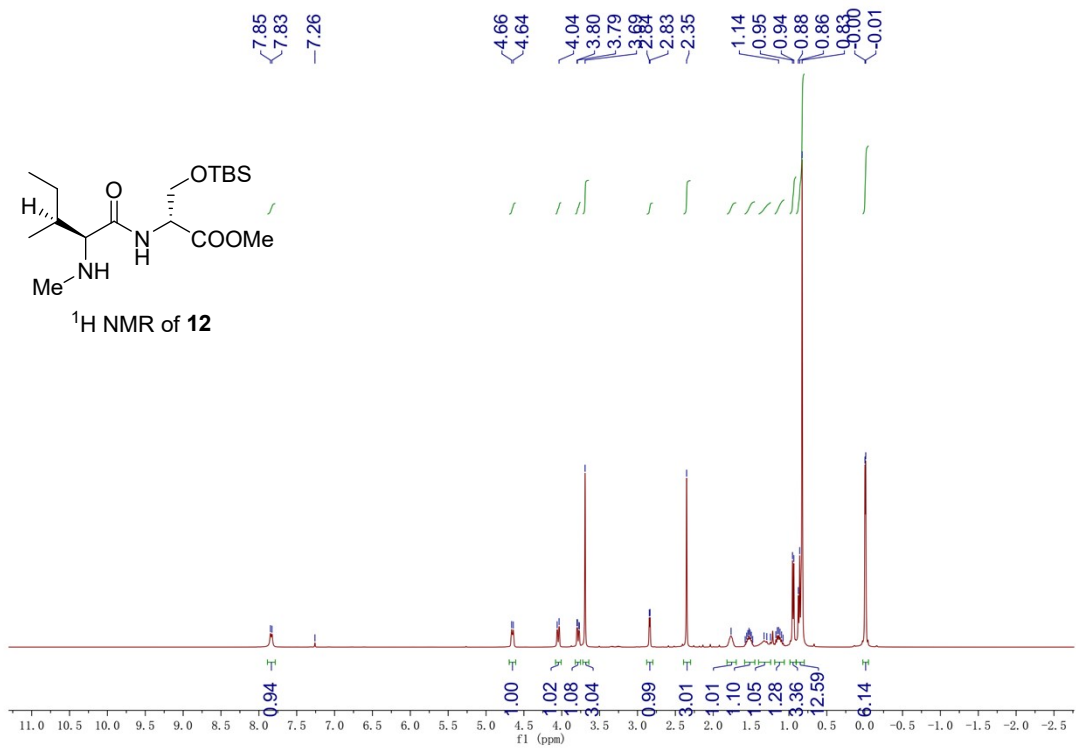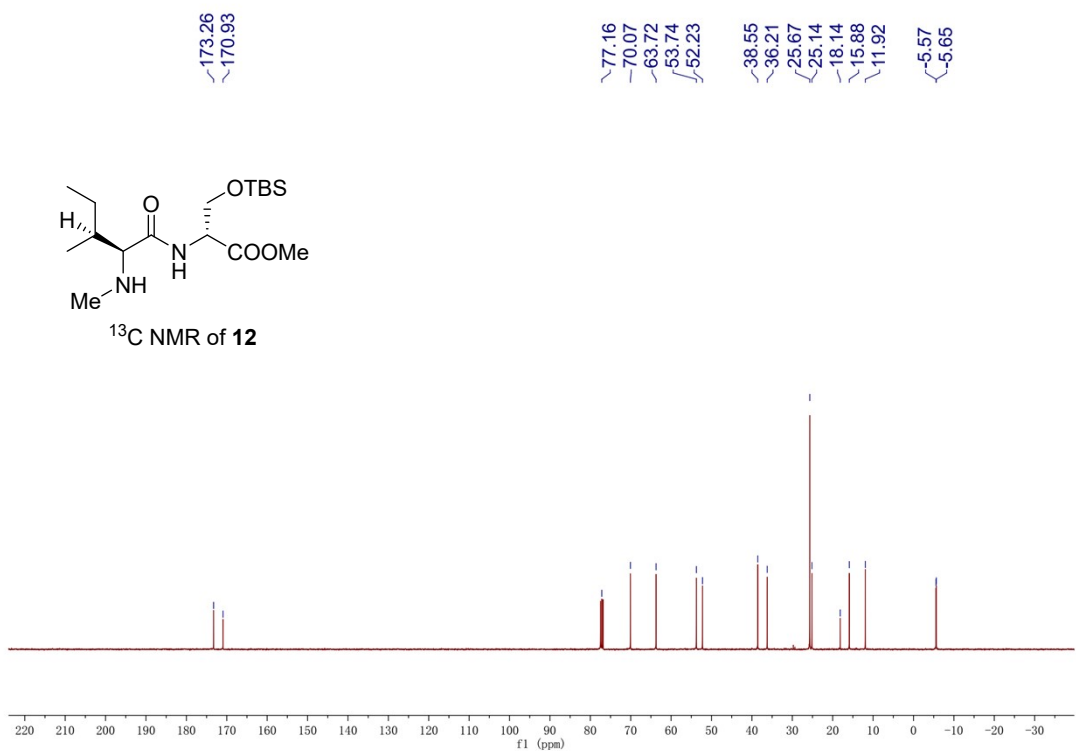

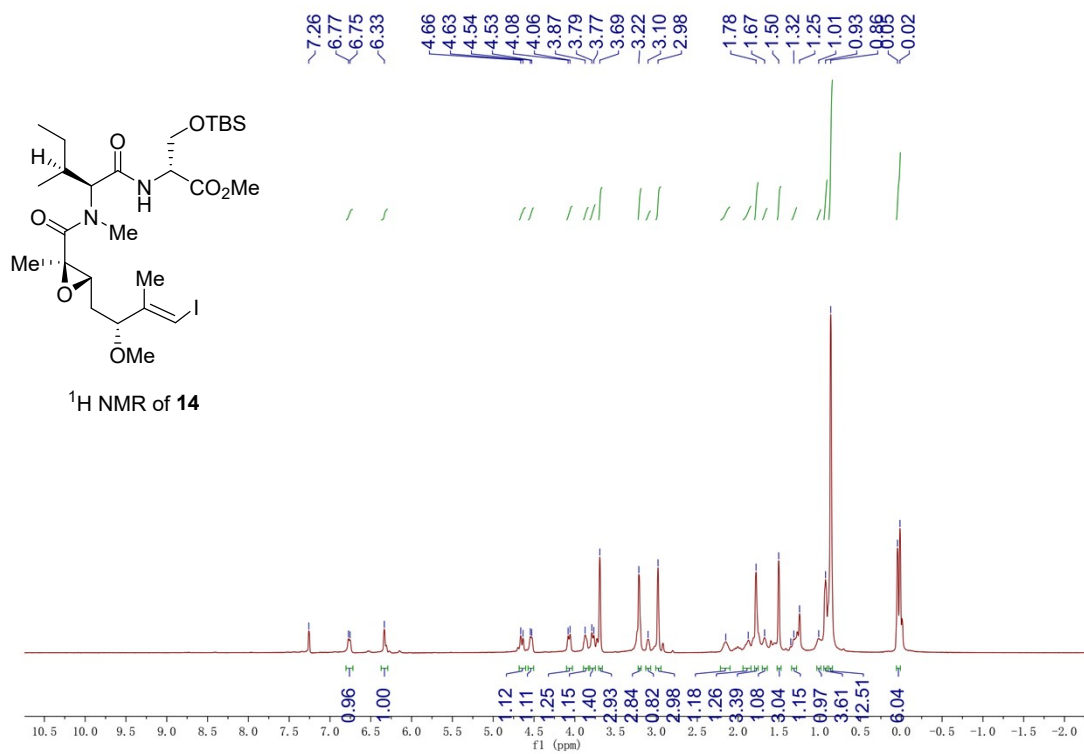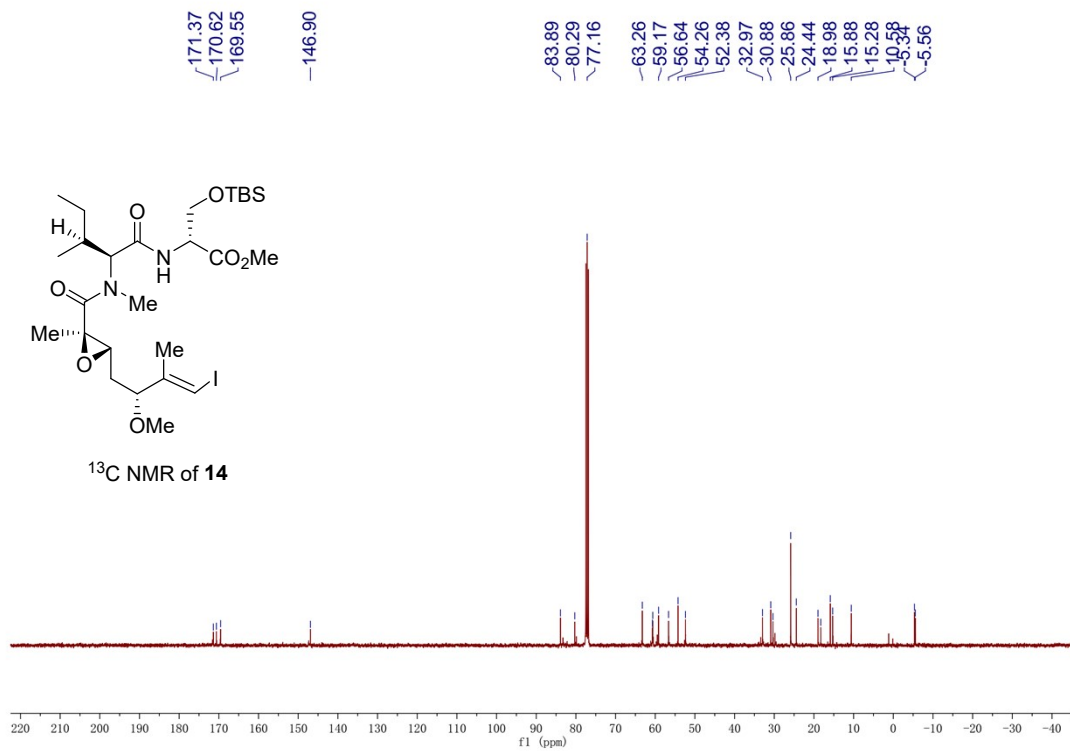

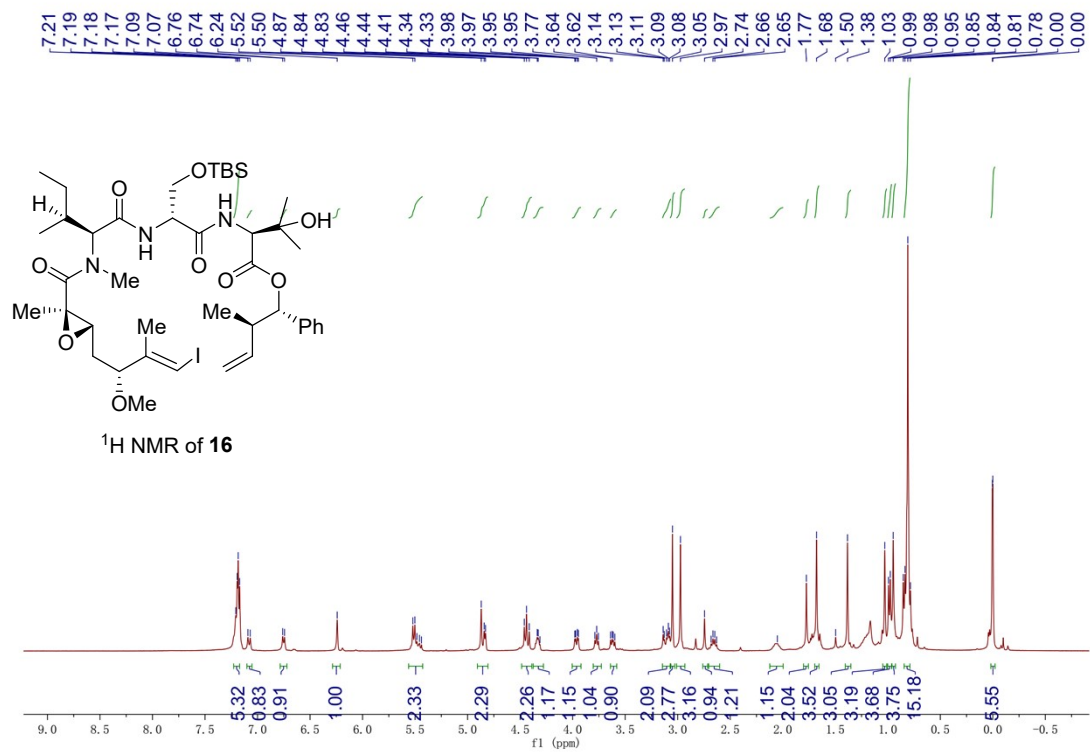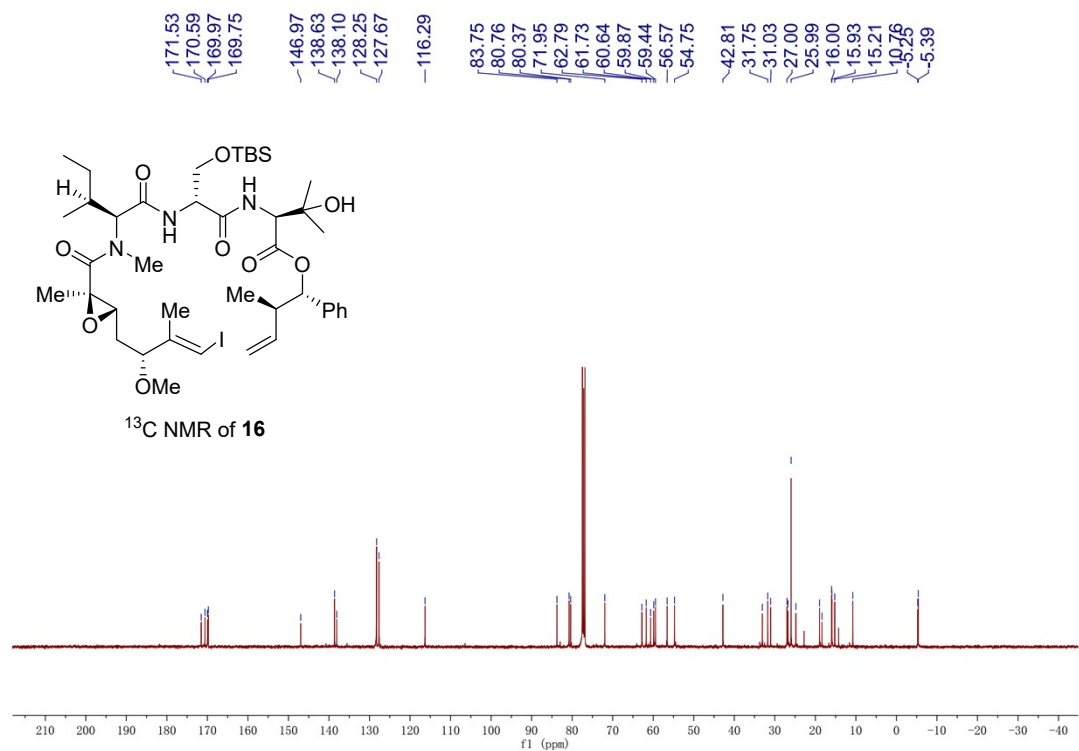

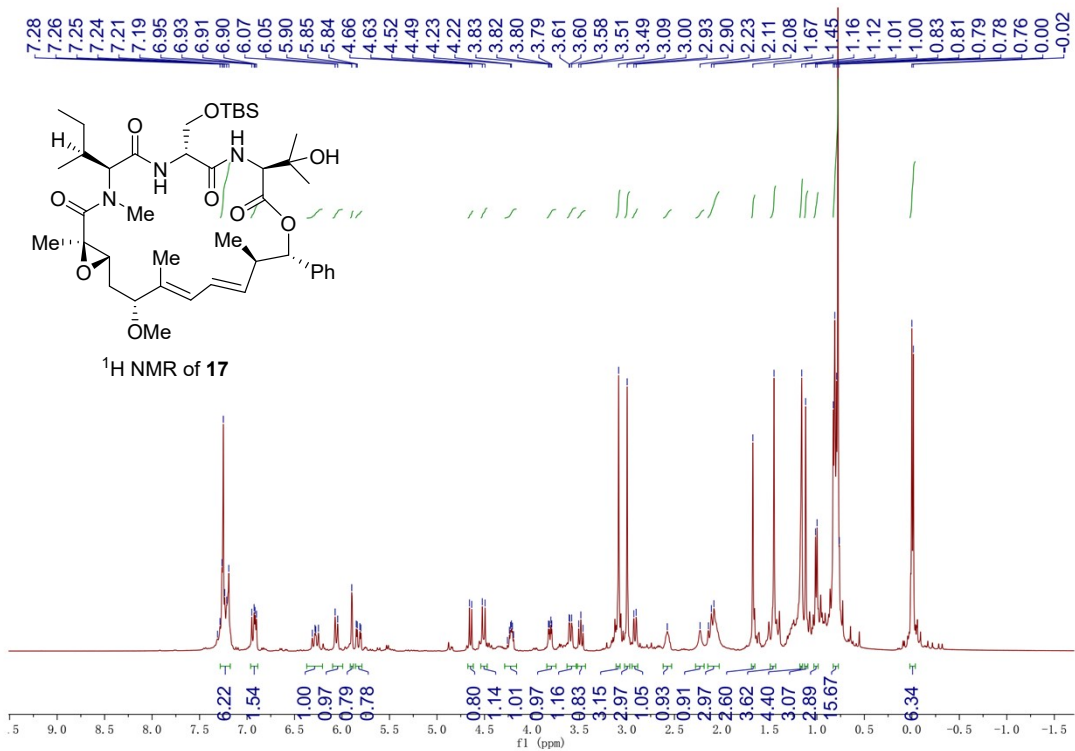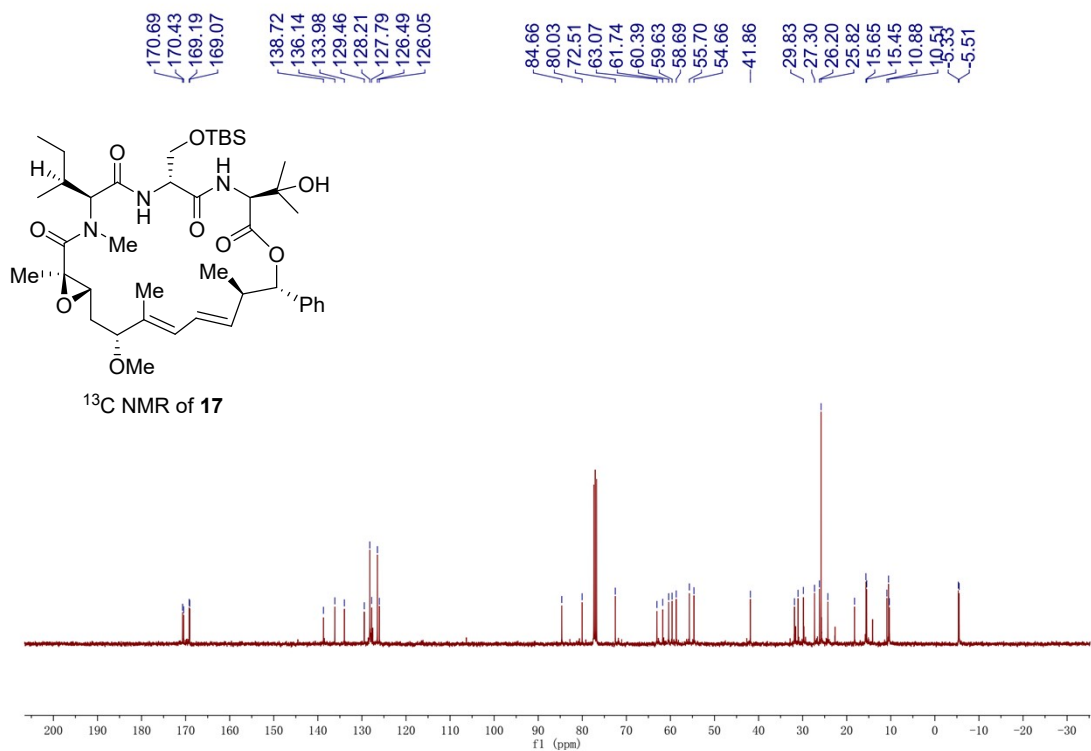

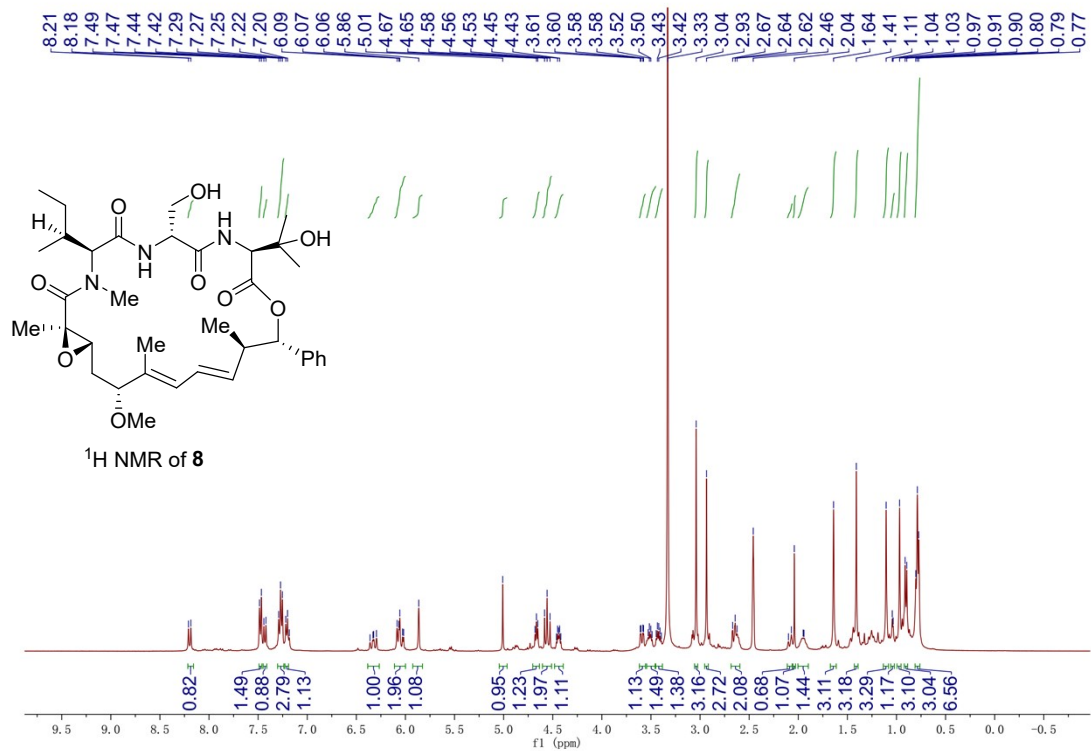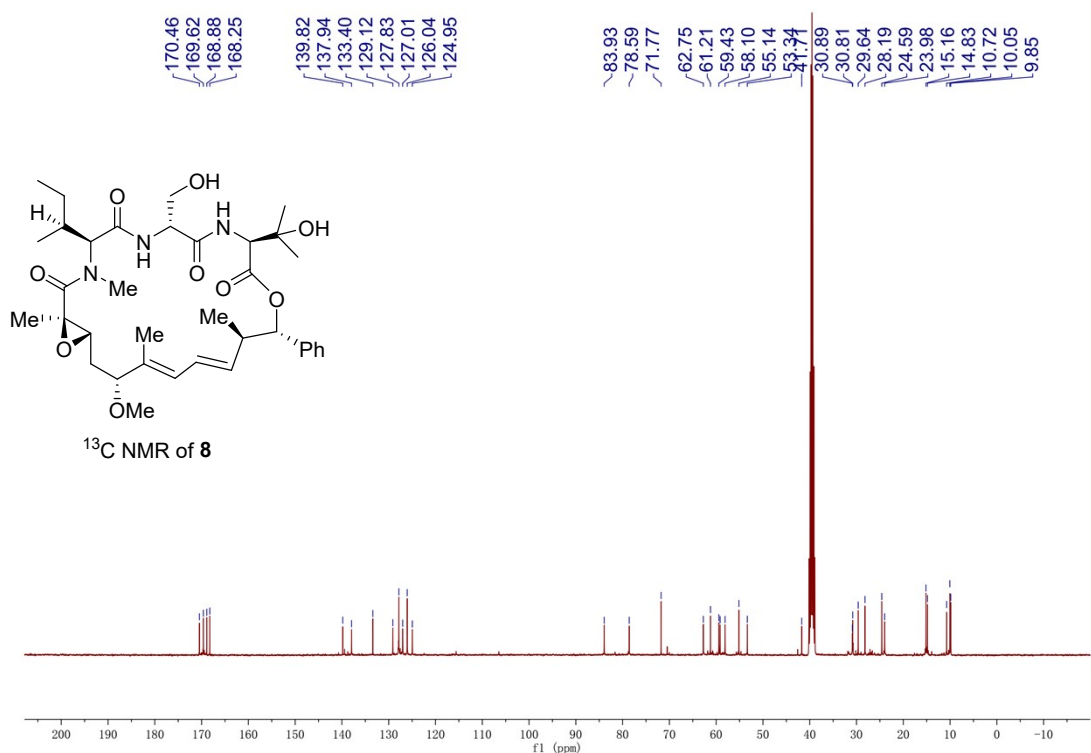



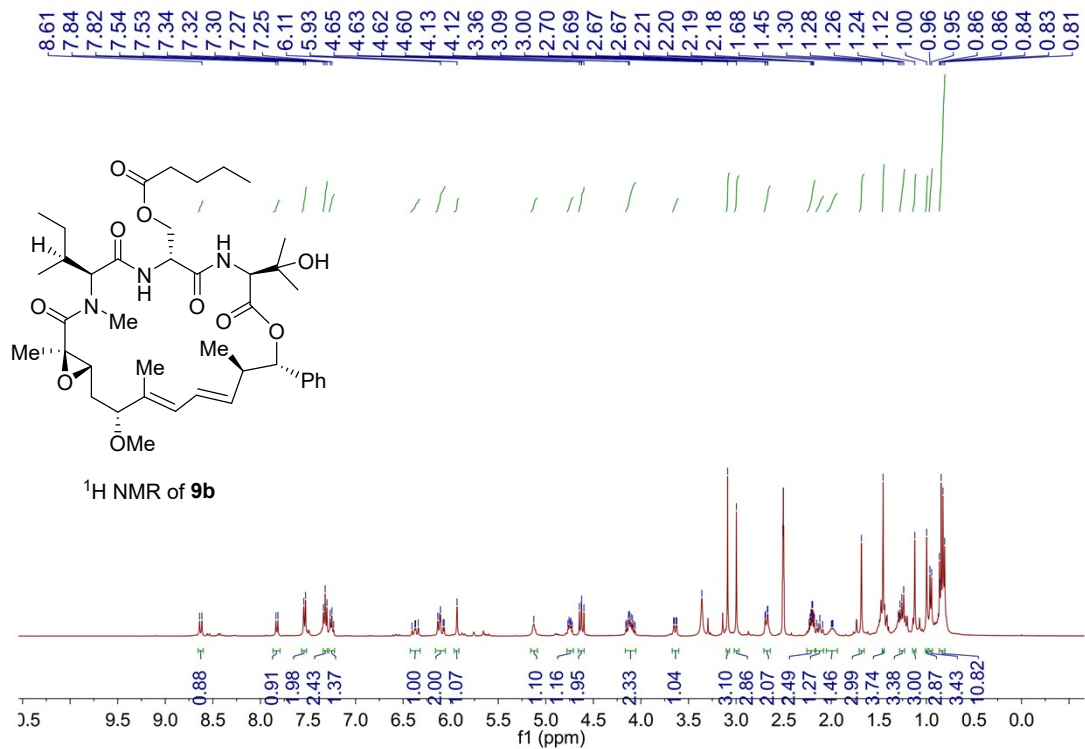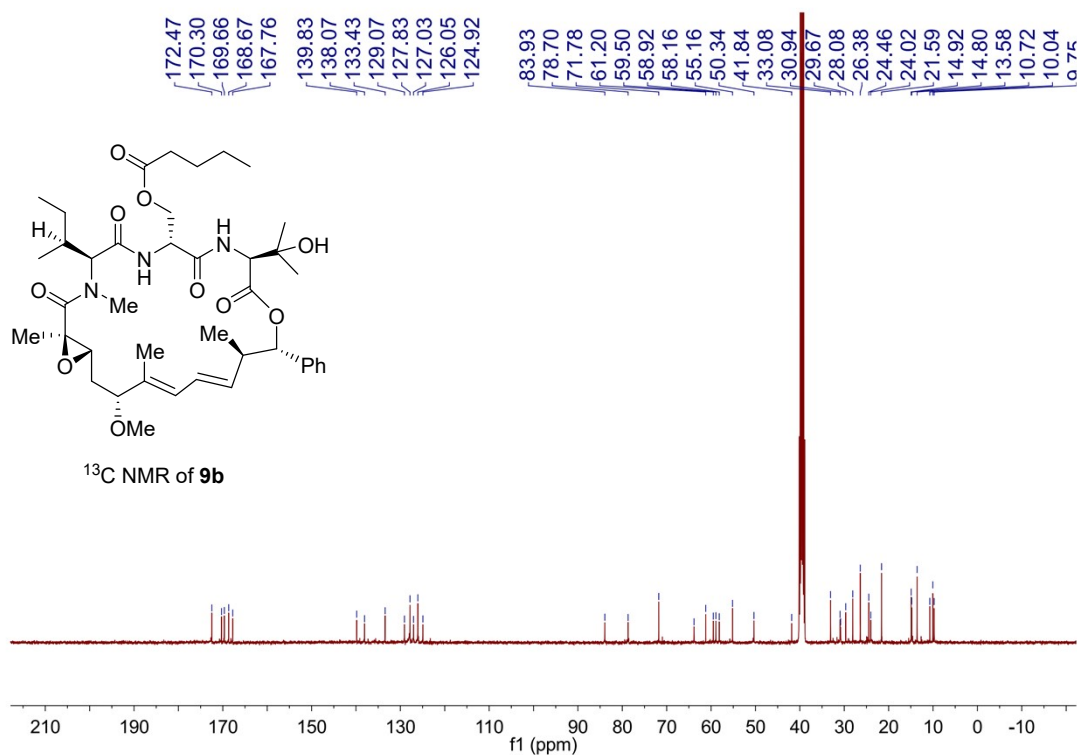







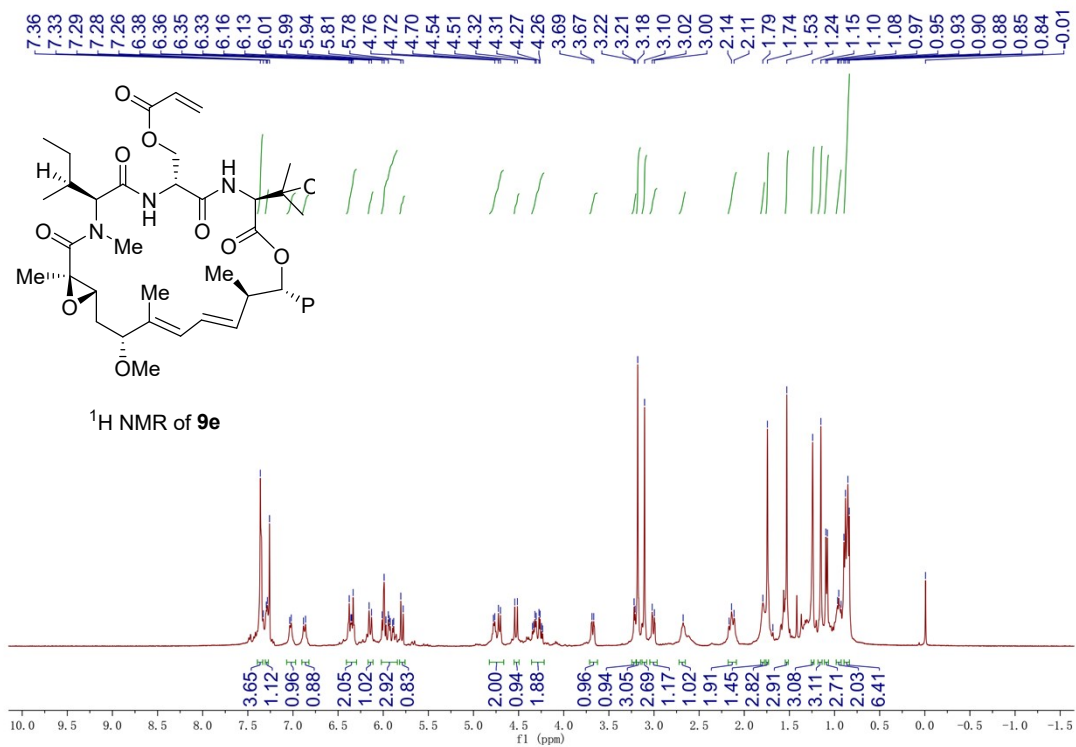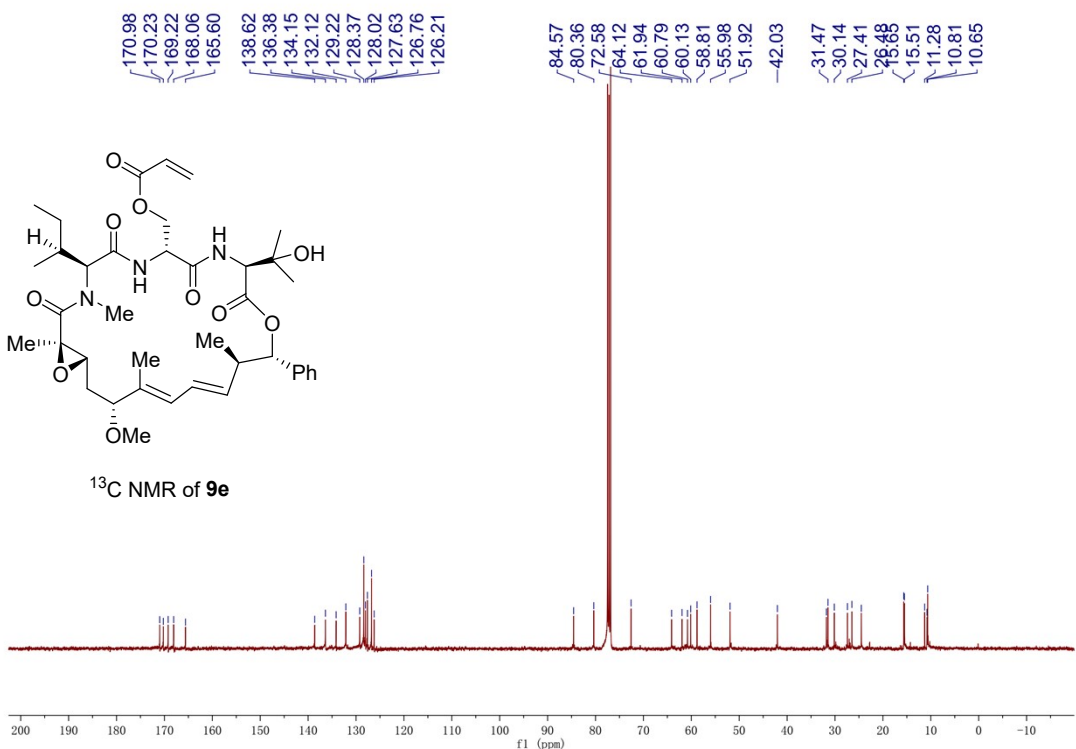



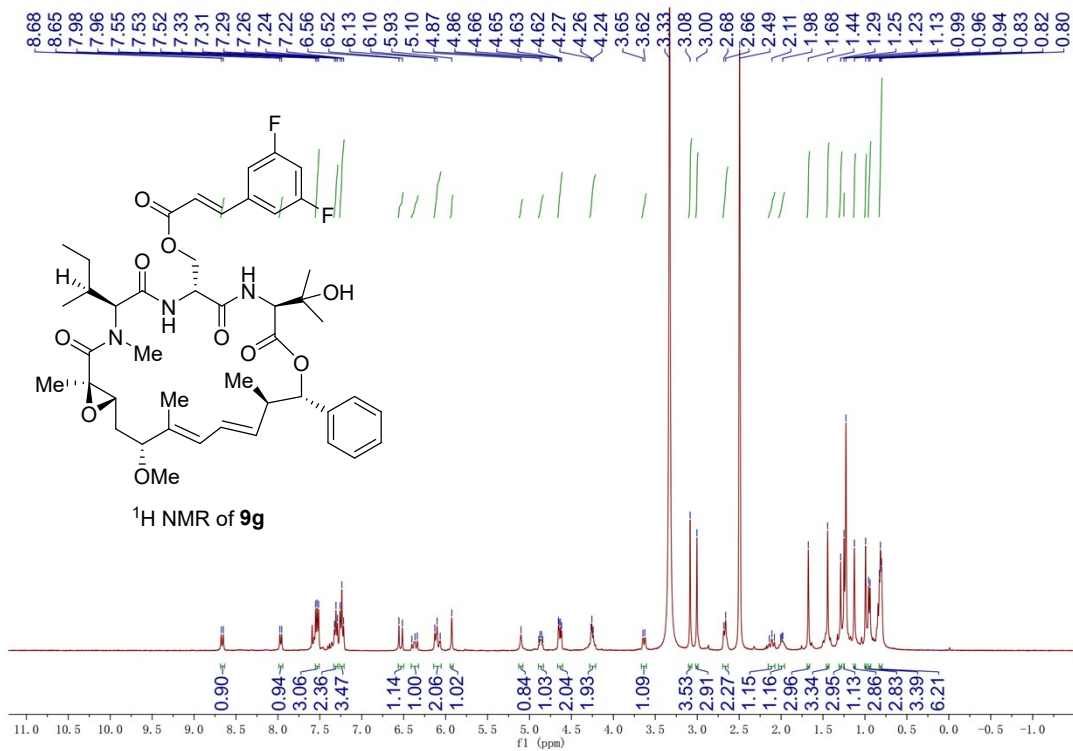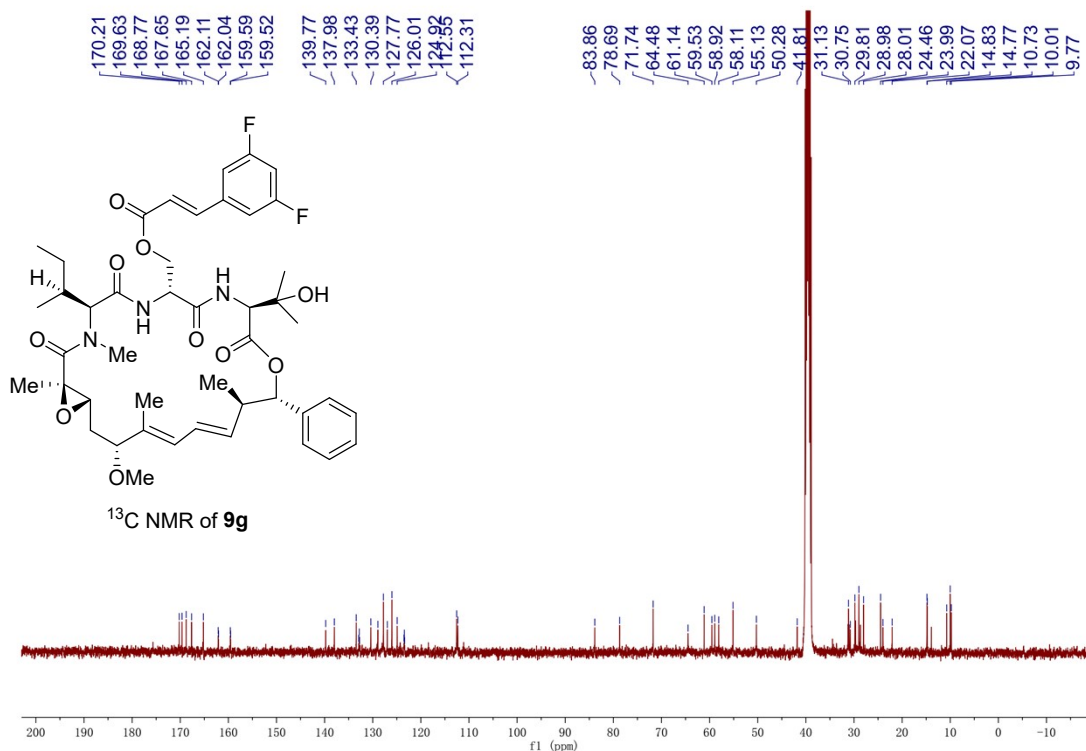



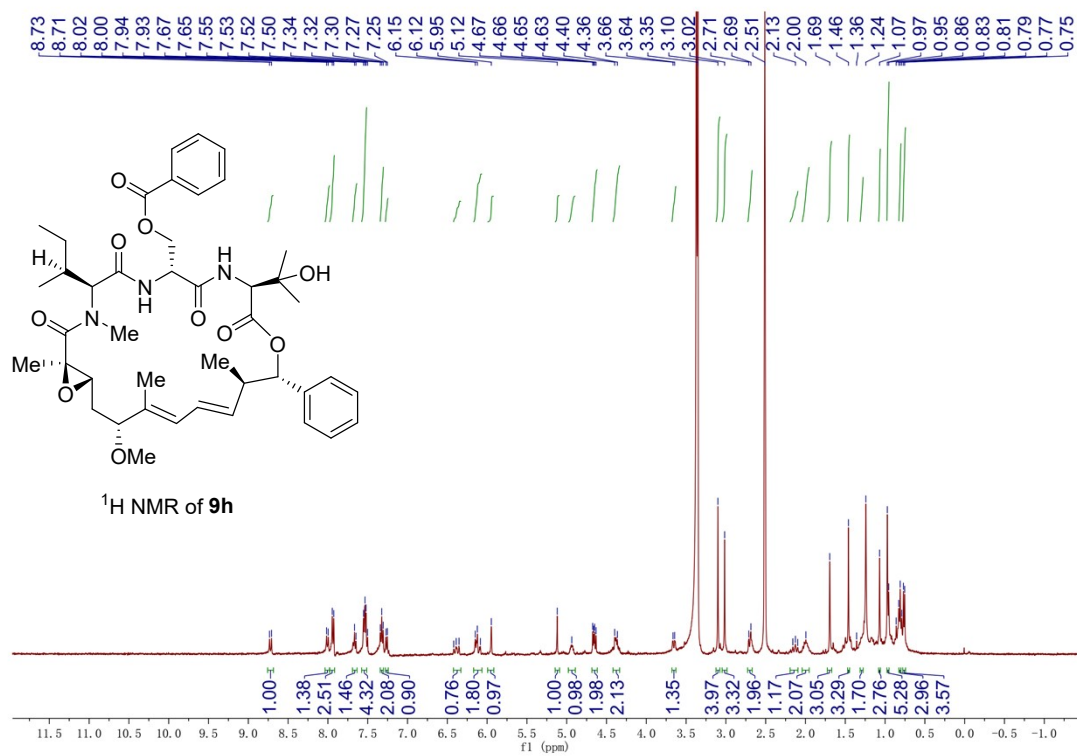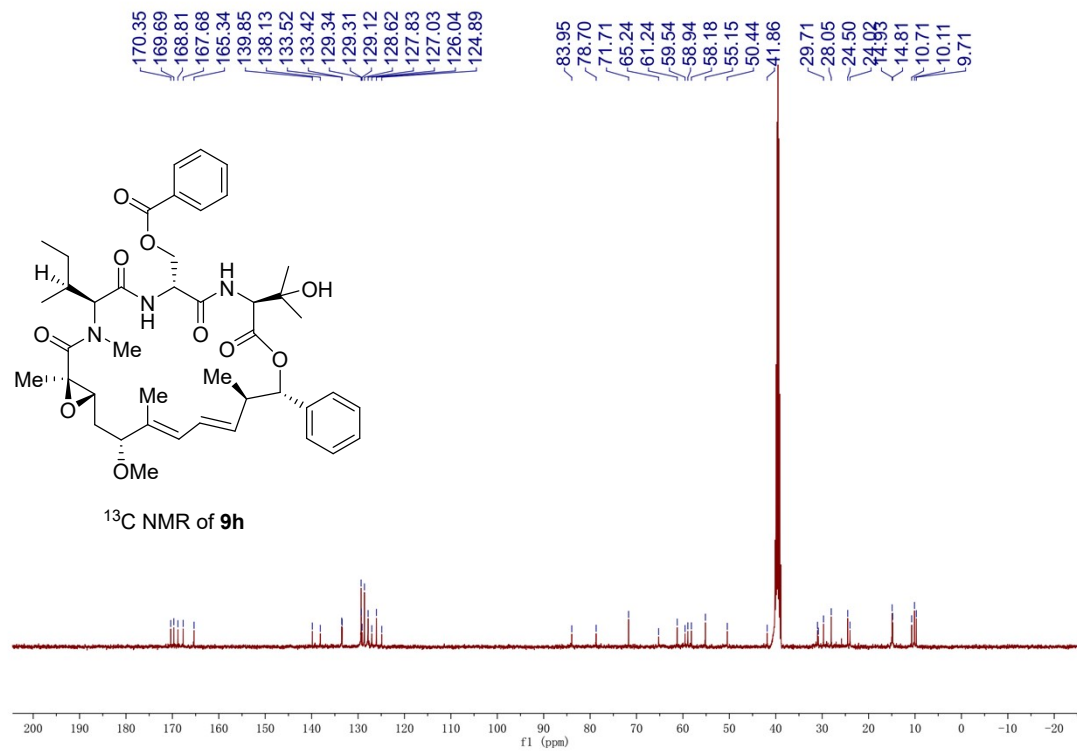

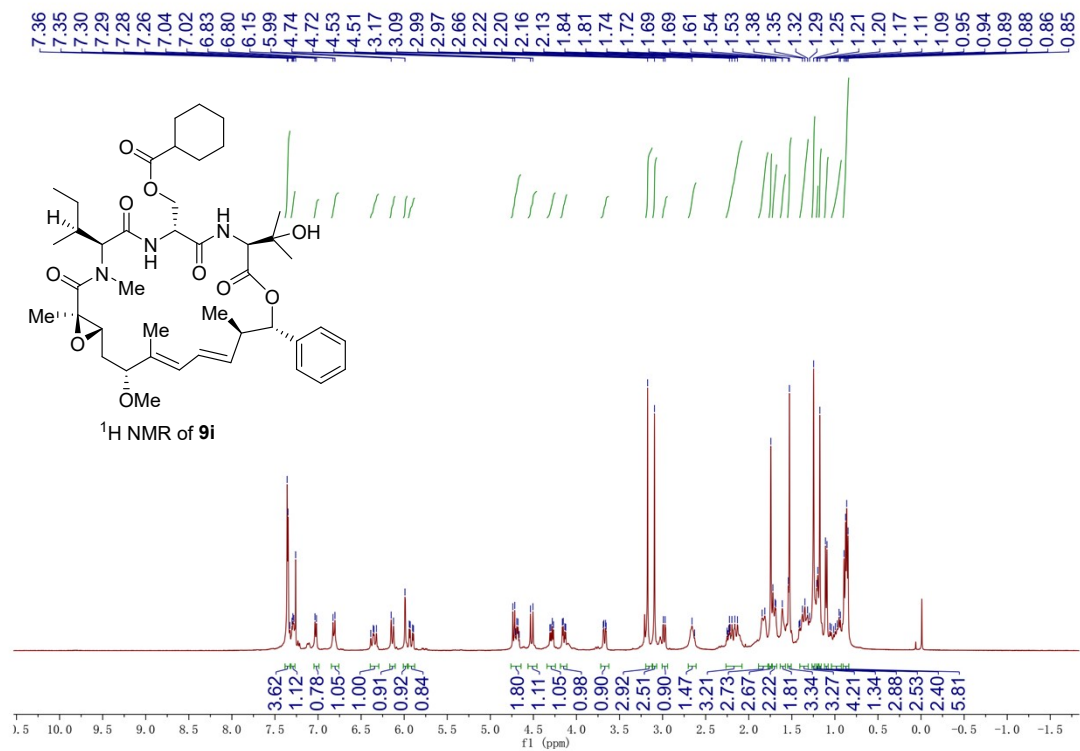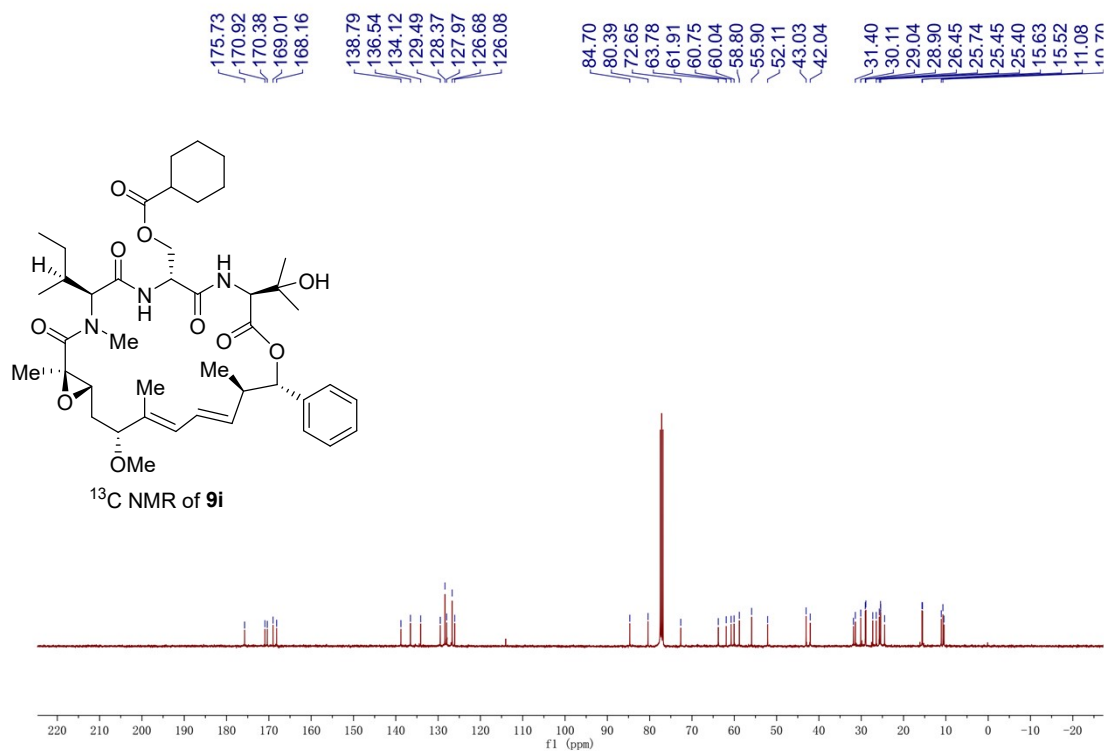



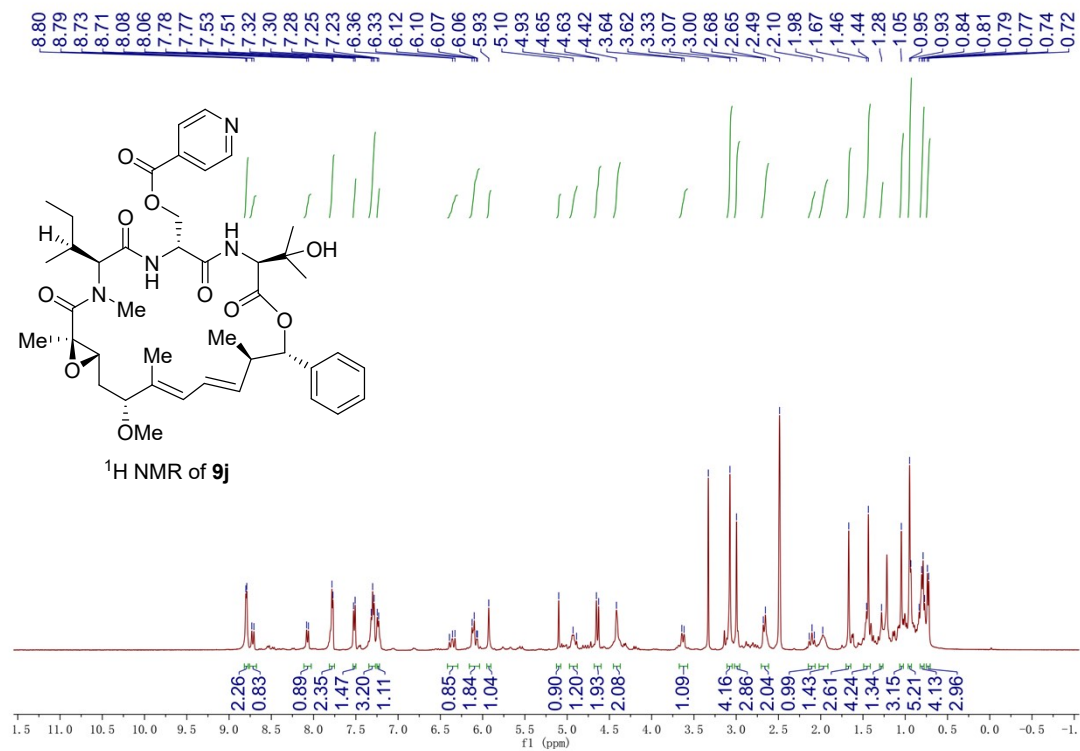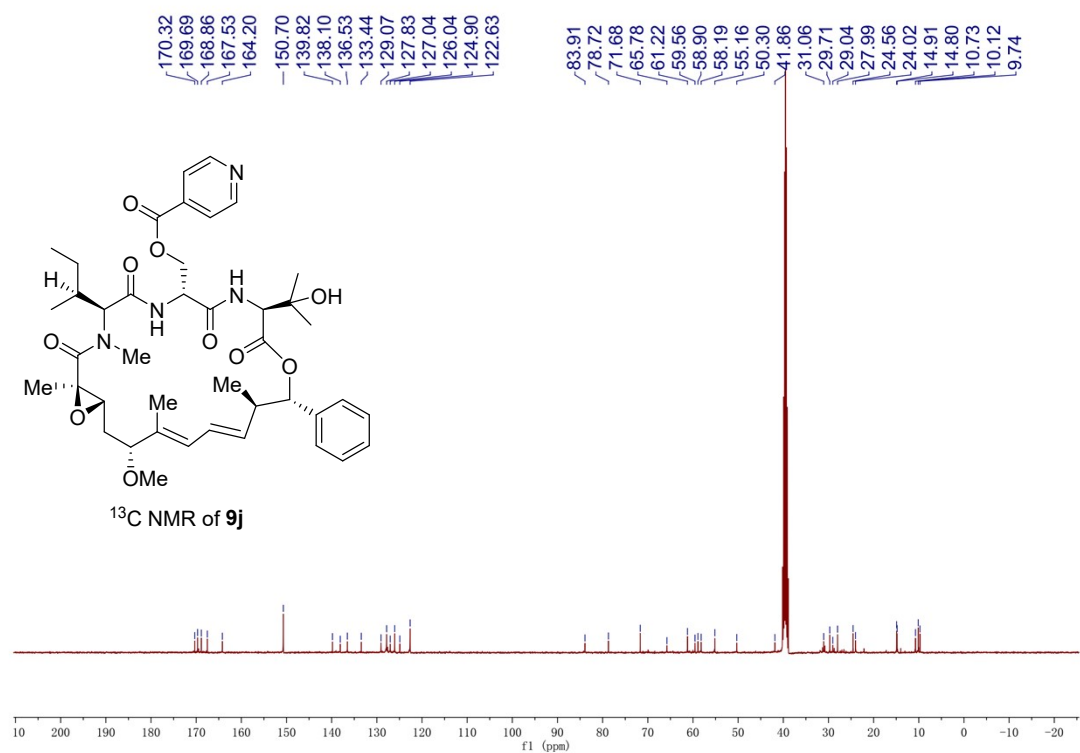

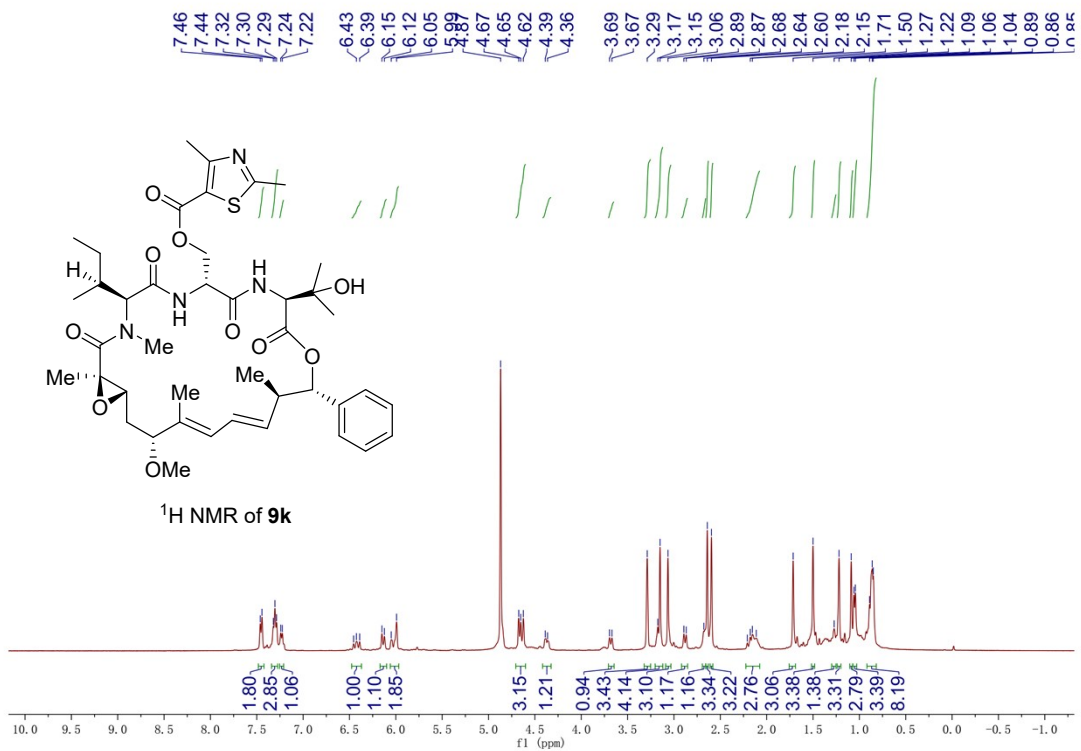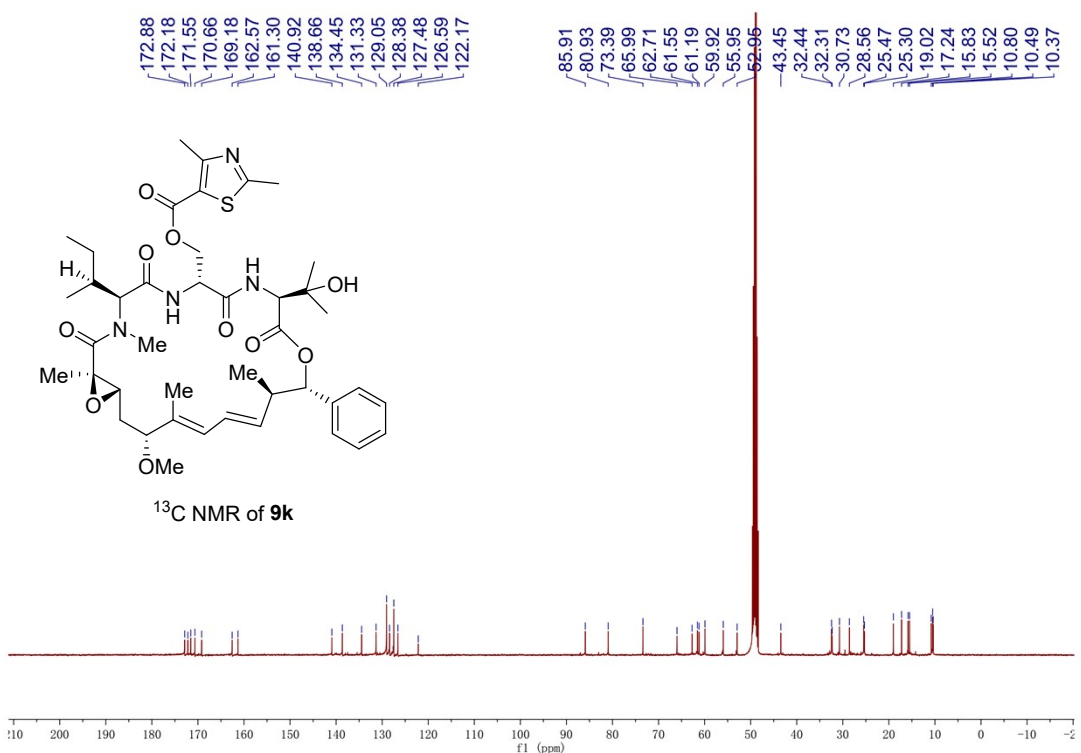

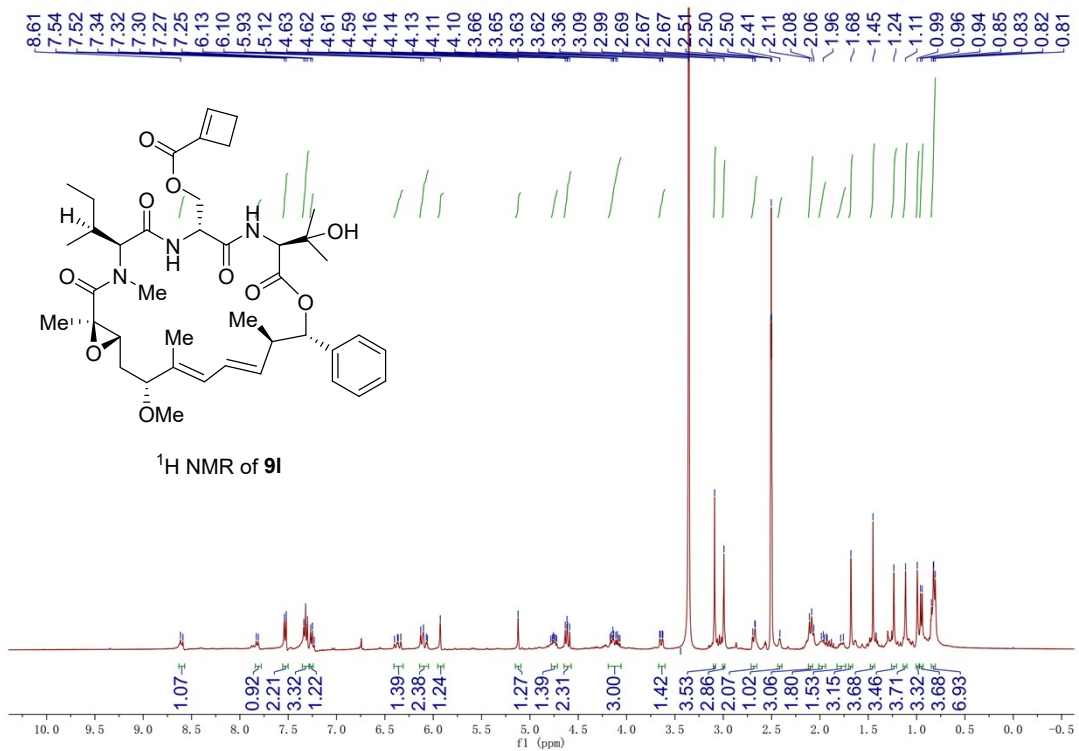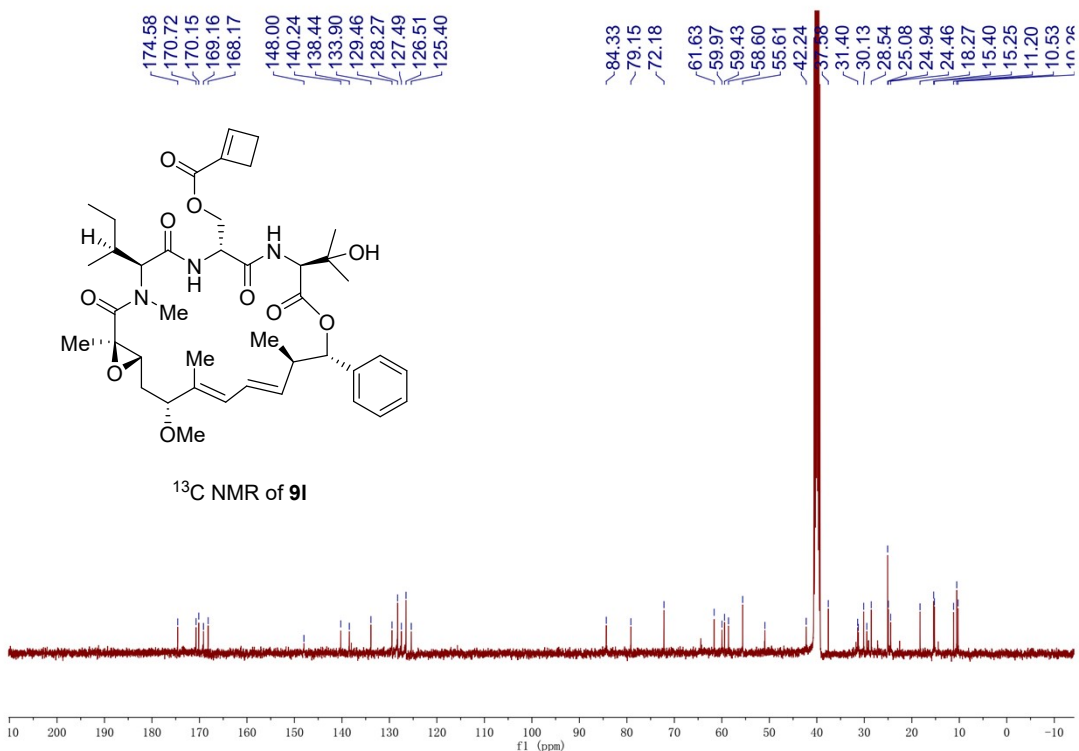



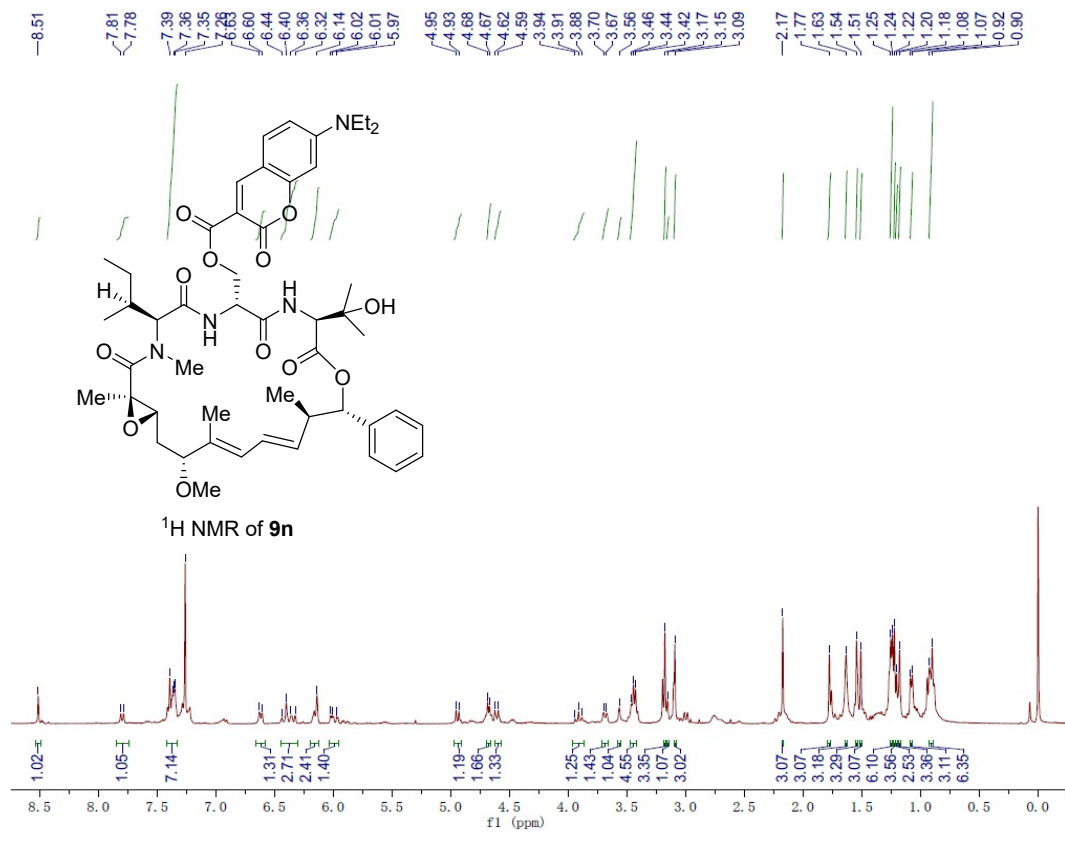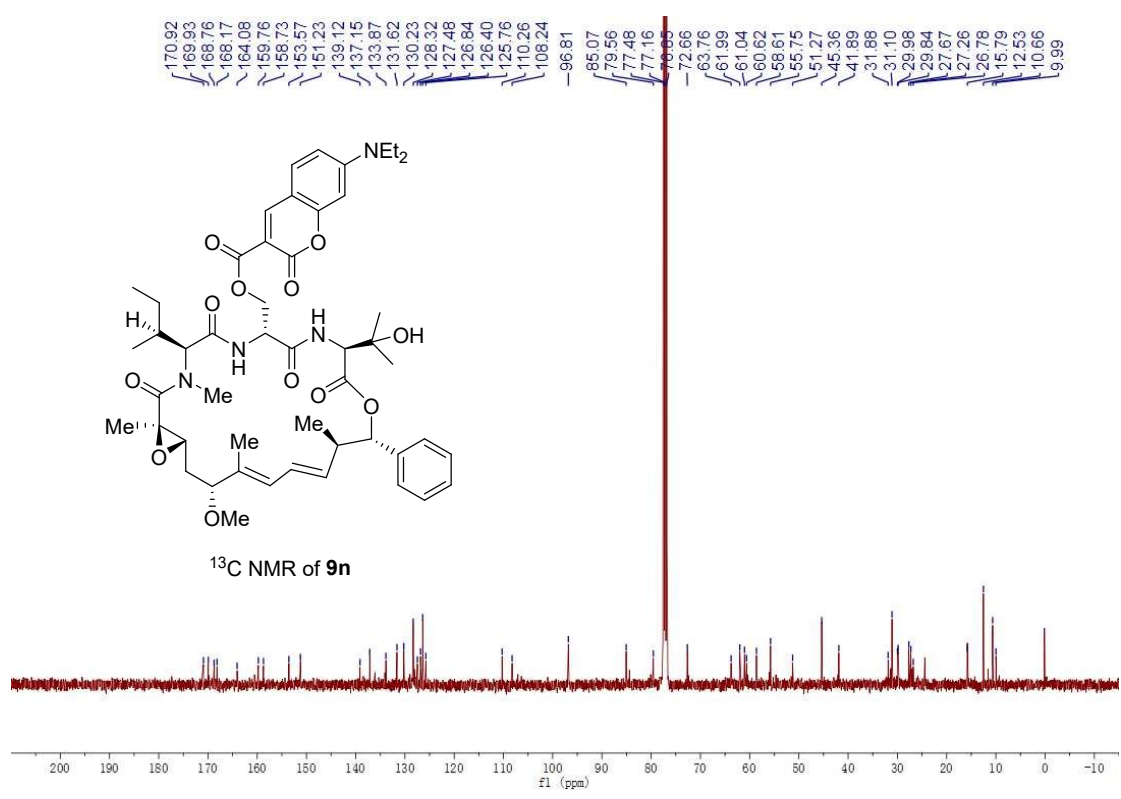

Supplement: d2md00393g1.pdf [file d2md00393g1.pdf]
